# Supplementary material for: Construction of unique Co3O4@CoMoO4 core/shell nanowire arrays on Ni foam by the action exchange method for high-performance supercapacitors
Source: Royal Society of Chemistry journal article supplement (doi:10.1039/c5ta01530h), 2015-01-01
Supplement: c5ta01530h1.pdf [file c5ta01530h1.pdf]

# Supporting Information

**Construction of unique  $\text{Co}_3\text{O}_4@\text{CoMoO}_4$  Core/Shell Nanowire  
Arrays on Ni Foam by action exchange method for Electrochemical  
Energy Storage**

Zhengxiang Gu, Honghong Nan, Baoyou Geng, Xiaojun Zhang\*

Key Laboratory for Functional Molecular Solids of the Education Ministry of China,  
College of Chemistry and Materials Science, Center for Nano Science and  
Technology, Anhui Normal University, Wuhu, 241000, P R China.

Fax: +86-553-3869302; Tel: +86-553-3937135

E-mail: xjzhang@mail.ahnu.edu.cn

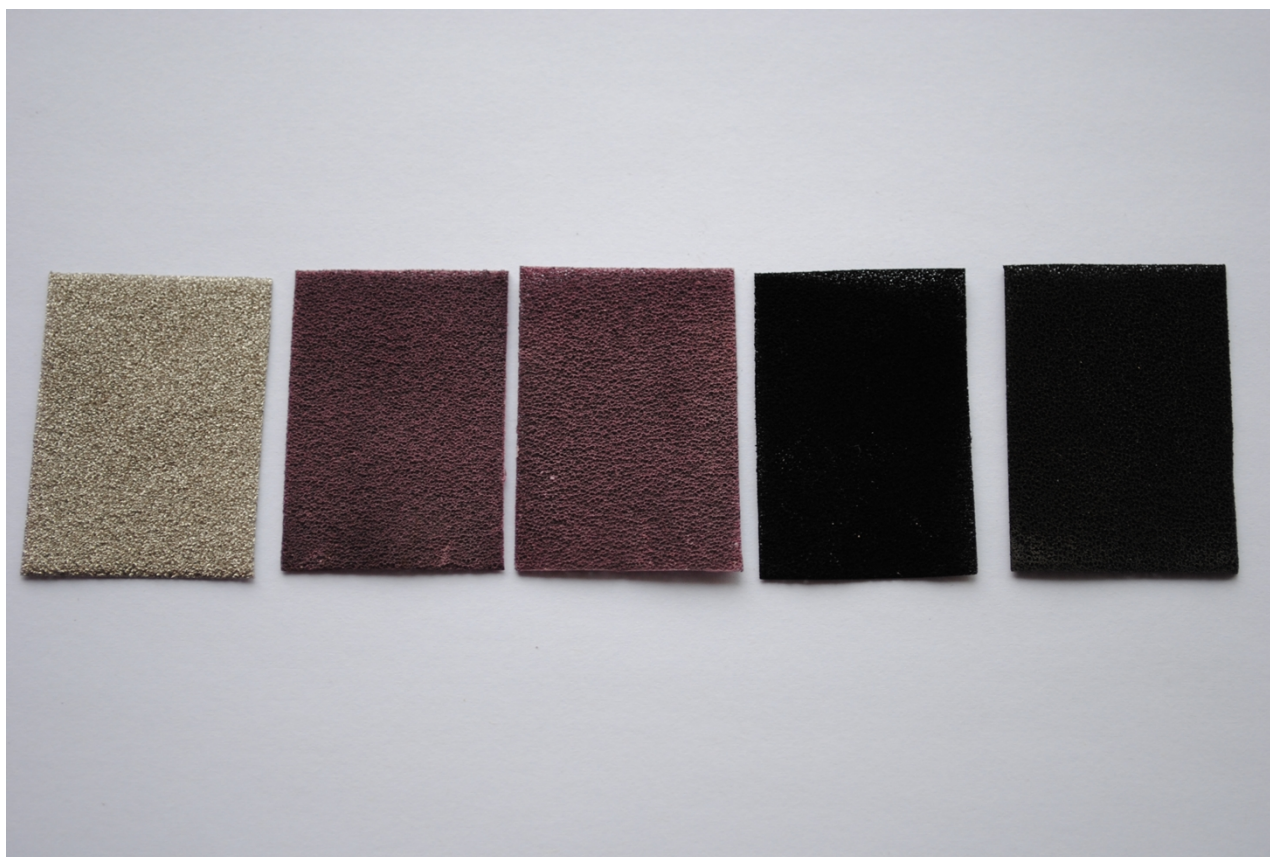

**Figure S1** photographs of nickel foam substrate,  $\text{Co}_3\text{O}_4$  precursor on nickel foam,  $\text{Co}_3\text{O}_4@ \text{CoMoO}_4$  precursor on nickel foam,  $\text{Co}_3\text{O}_4$  NWAs on nickel foam and  $\text{Co}_3\text{O}_4@ \text{CoMoO}_4$  NWAs on nickel foam.

**Equation:** The specific capacitance( $C_s$ ) and The power density( $P$ ) and energy density ( $E$ ) were calculated according to following equations:

**Equation 1:**

$$C_s = \frac{It}{mV}$$

**Equation 2:**

$$E = \frac{1}{2} C_s V^2$$

**Equation 3:**

$$P = \frac{E}{t}$$

Where  $I$  was the constant discharge current(A),  $t$  was discharge time(s),  $V$  was the potential window(V),  $m$  was the total mass(g) of the electrode material on Ni foam.

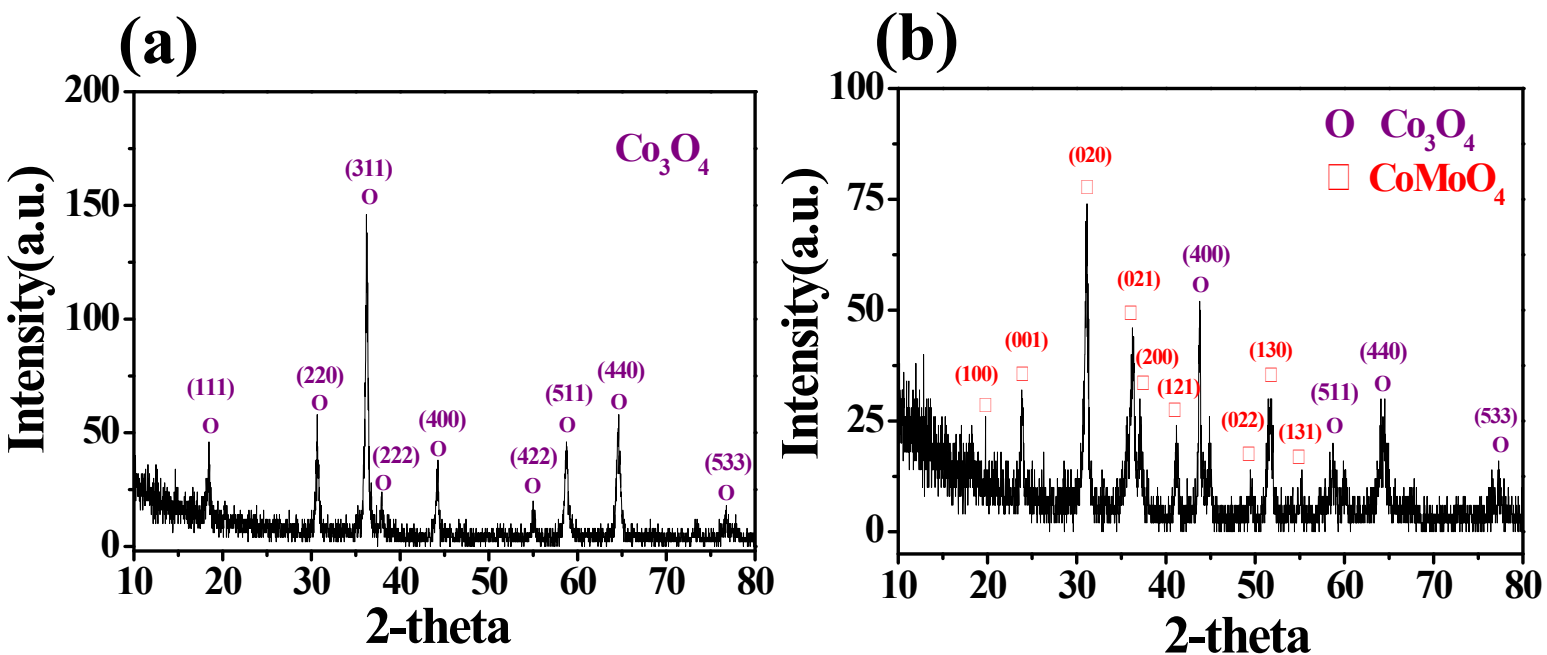

**Figure S2** (a) Typical XRD patterns of the  $\text{Co}_3\text{O}_4$  NWAs (b) XRD pattern of the  $\text{Co}_3\text{O}_4@ \text{CoMoO}_4$  (10 h) core/shell composite scratched from Ni foam.

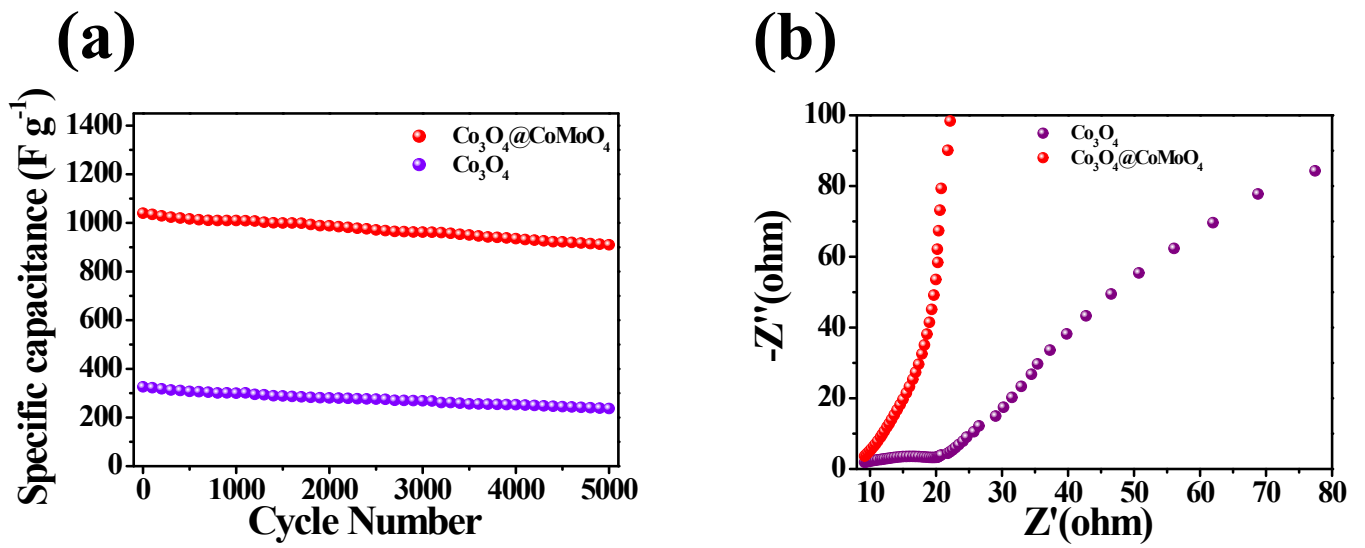

**Figure S3** Long-term cycling stability of the Co<sub>3</sub>O<sub>4</sub> and Co<sub>3</sub>O<sub>4</sub>@CoMoO<sub>4</sub> hybrid electrodes. (d) Impedance Nyquist plots of the Co<sub>3</sub>O<sub>4</sub> electrode and the Co<sub>3</sub>O<sub>4</sub>@CoMoO<sub>4</sub> hybrid electrode.

**(a)**

**(b)**

**(c)**

**(d)**

**Figure S4** Morphologies of the  $\text{Co}_3\text{O}_4@\text{CoMoO}_4$  nanostructure at various reaction stages by setting the reaction time to (a) 2 h, (b) 5 h, (c) 15 h, (d) 20 h.
